# Supplementary material
Source: PubMed Central journal article supplement (PMC6990820)
Supplement: jamainternmed-180-198-s001.pdf [file jamainternmed-180-198-s001.pdf]

## Supplementary Online Content

Sengupta J, Storey K, Casey S, et al. Outcomes before and after the recall of a heart failure pacemaker. *JAMA Intern Med*. Published online December 20, 2019.  
doi:10.1001/jamainternmed.2019.5171

**eTable.** Patient demographic information and characteristics.

This supplementary material has been provided by the authors to give readers additional information about their work.

**eTable. Patient demographic information and characteristics.**

| <b>Demographics</b>                 | <b>N=90</b>     |
|-------------------------------------|-----------------|
| Median age (yrs) at implant, IQR    | 71 [66.1, 78.2] |
| % Men                               | 41              |
| <b>Characteristics n (%)</b>        |                 |
| Ischemic cardiomyopathy             | 15 (17)         |
| Non-ischemic cardiomyopathy         | 22 (24)         |
| Coronary artery disease             | 27 (30)         |
| Valvular heart disease              | 9 (10)          |
| Hypertensive cardiovascular disease | 5 (6)           |
| Congestive heart failure            | 20 (22)         |
| <b>Rhythm</b>                       |                 |
| Atrial fibrillation                 | 76 (84)         |
| Atrial flutter                      | 2 (2)           |
| Sinus                               | 9 (10)          |
| Sinus bradycardia                   | 2 (2)           |
| Sinus + PSVT                        | 1 (1)           |
| <b>Abnormal Conduction</b>          |                 |
| Complete HB                         | 20 (22)         |
| Complete HB after AVN ablation      | 57 (63)         |
| Left bundle branch block            | 5 (6)           |

PSVT=paroxysmal supraventricular tachycardia

HB=heart block; AVN=atrioventricular node

Some patients had more than one diagnosis.

IQR=interquartile range
